# Supplementary material for: Bayesian Inference-Based Estimation of Hourly Primary and Secondary Organic Carbon at Suburban Hong Kong: Multi-temporal Scale Variations and Evolution Characteristics during PM 2.5 episodes
Source: Copernicus journal article supplement (doi:10.5194/egusphere-2023-2286), 2023-10-23
Supplement: Supplementary file 1 [file egusphere-2023-2286-supplement.pdf]

5

## **Bayesian Inference-Based Estimation of Hourly Primary and Secondary Organic Carbon at Suburban Hong Kong: Multi-temporal Scale Variations and Evolution Characteristics during PM<sub>2.5</sub> episodes**

10

Shan Wang<sup>1#</sup>, Kezheng Liao<sup>2#</sup>, Zijing Zhang<sup>1</sup>, Yuk Ying Cheng<sup>2</sup>, Qiongqiong Wang<sup>3, 2</sup>, Hanzhe Chen<sup>1</sup>, and Jian Zhen Yu<sup>1,2,\*</sup>

<sup>1</sup>Division of Environment and Sustainability, The Hong Kong University of Science and Technology, Clear Water Bay, Hong Kong, China

15 <sup>2</sup>Department of Chemistry, The Hong Kong University of Science and Technology, Clear Water Bay, Hong Kong, China

<sup>3</sup>School of Environmental Studies, China University of Geosciences, Wuhan, China

<sup>#</sup>These authors contributed equally to this work.

\*Corresponding to: Jian Zhen Yu ([jian.yu@ust.hk](mailto:jian.yu@ust.hk))

20

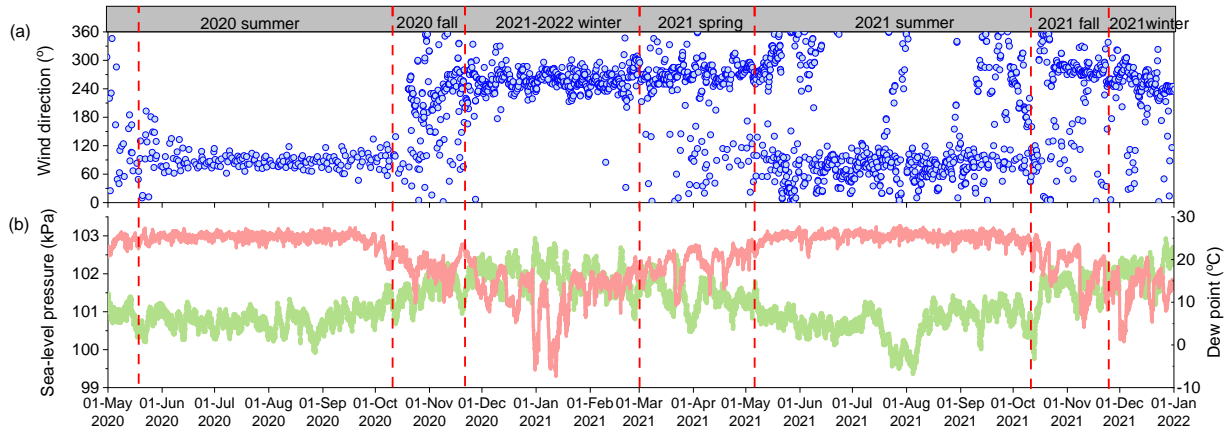

**Figure S1. Time series of (a) upper wind direction at  $15000 \pm 1000$  m height, and (b) sea-level pressure and dew point at Hong Kong Observatory station from 1 May 2021 to 31 December 2021.**

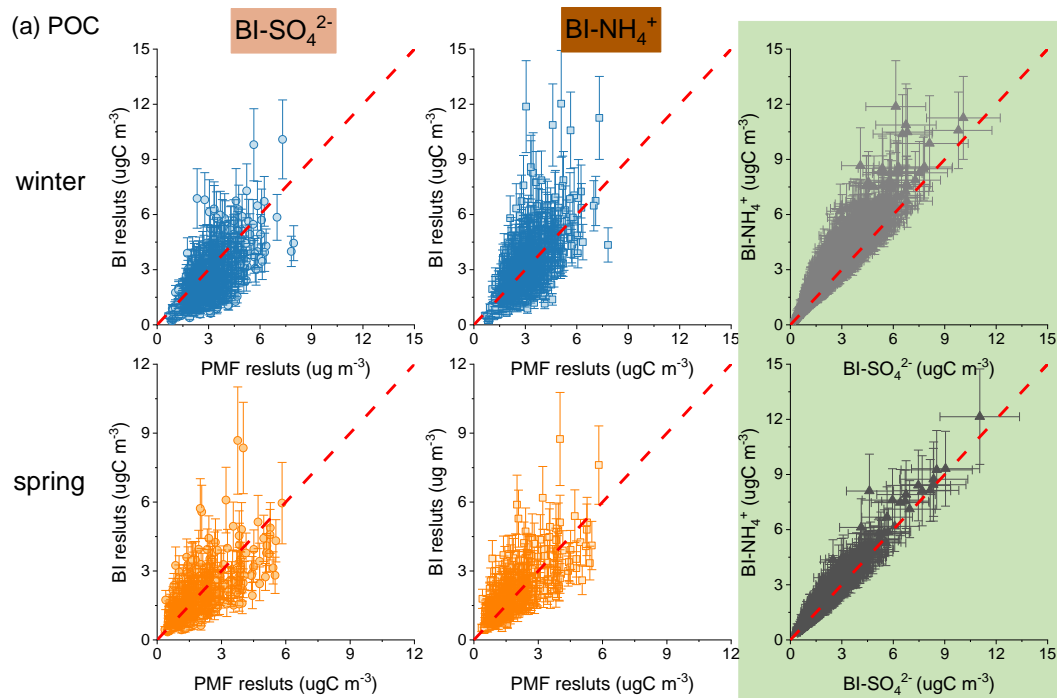

25

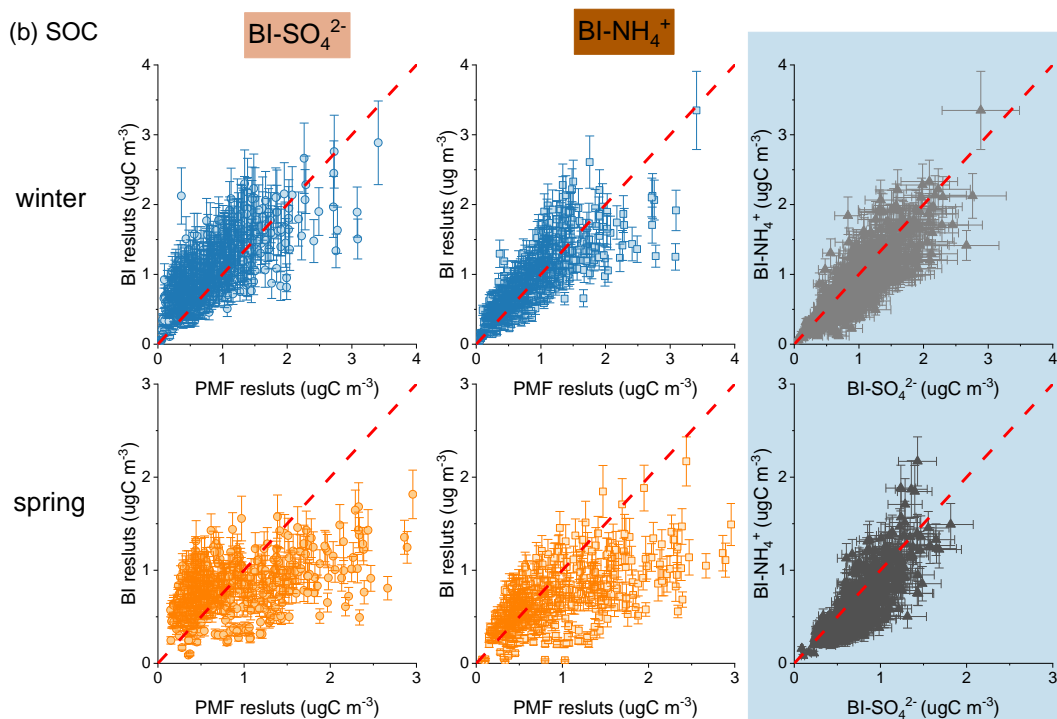

Figure S2. (a) POC and (b) SOC estimations for the HKUST winter (24 November 2020 – 28 February 2021) and spring (1 March -2 May 2021) data. Results comparison between PMF and BI with sulfate and ammonium as tracers for SOC.

30

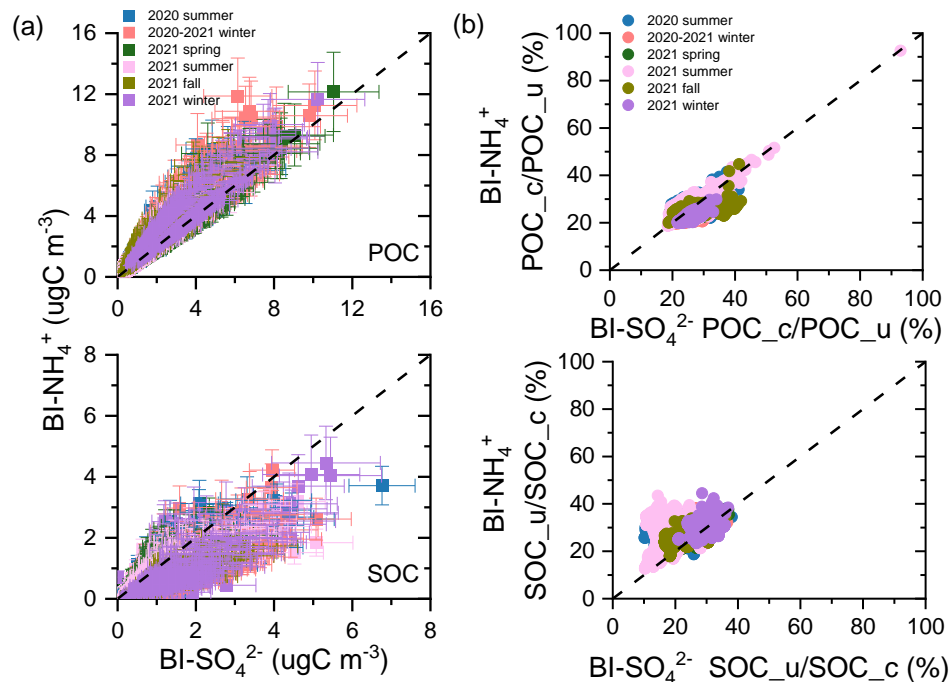

**Figure S3. Comparison of (a) absolute concentration and uncertainty and (b) relative uncertainty of POC and SOC between BI with sulfate and ammonium as tracers for SOC.**

**35 Table S1. Model performance evaluation metrics (Bayesian Inference Criterion, BIC)<sup>a</sup> for individual seasons using sulfate, nitrate and ammonium as tracers for SOC.**

| Tracers / Period | SO <sub>4</sub> <sup>2-</sup> | NO <sub>3</sub> <sup>-</sup> | NH <sub>4</sub> <sup>+</sup> |
|------------------|-------------------------------|------------------------------|------------------------------|
| 2020 summer      | 2247                          | 3150                         | 2713                         |
| 2020-2021 winter | <b>6266</b>                   | 6768                         | 7065                         |
| 2021 spring      | <b>10525</b>                  | 10731                        | 13450                        |
| 2021 summer      | 15951                         | 16491                        | <b>14511</b>                 |
| 2021 fall        | <b>2614</b>                   | 3793                         | 4117                         |
| 2021 winter      | <b>2445</b>                   | 2449                         | 2600                         |
| Entire           | <b>40047</b>                  | 43382                        | 44456                        |

<sup>a</sup>Note: bold numbers are the minimum values, represents the most optimal model performance.

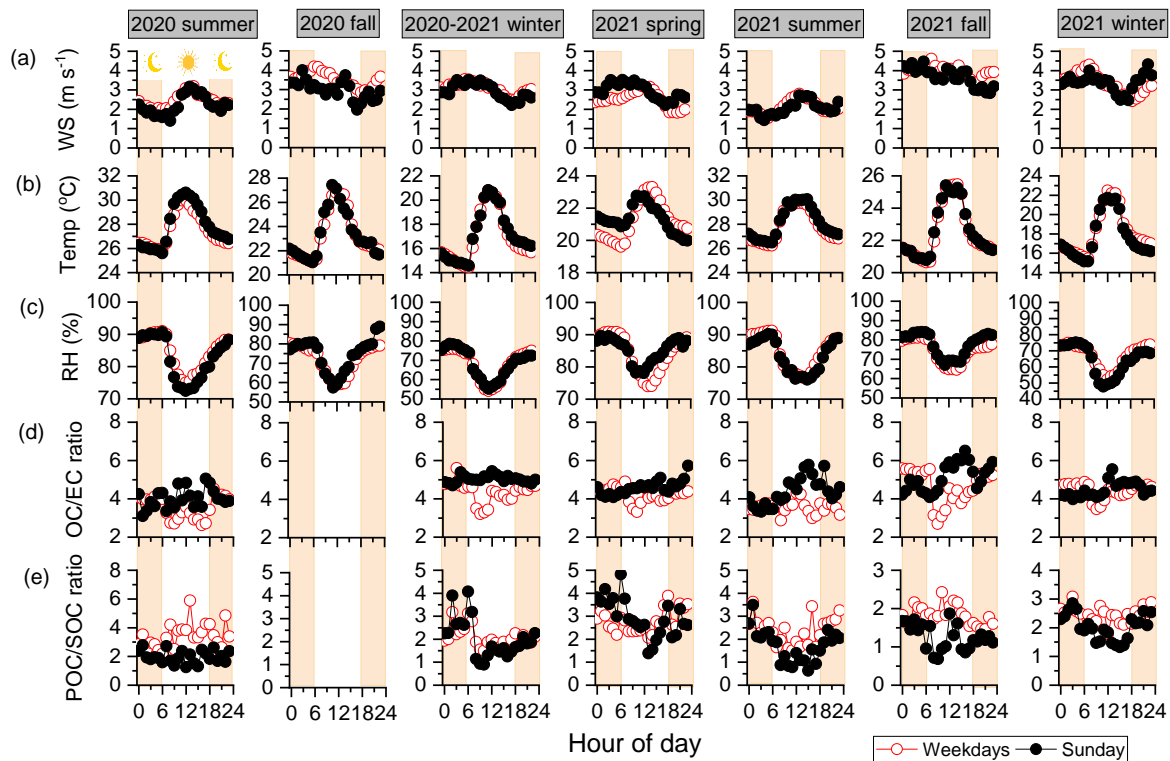

40 Figure S4. Diurnal variations of (a) wind speed, (b) temperature, (c) RH, and (d) OC/EC ratio and (e) POC/SOC ratio over the entire measurement period. The circles represent the hourly data averaged over weekdays (Monday -Saturday, red) and Sunday (black). The yellow shades represent nighttime periods.

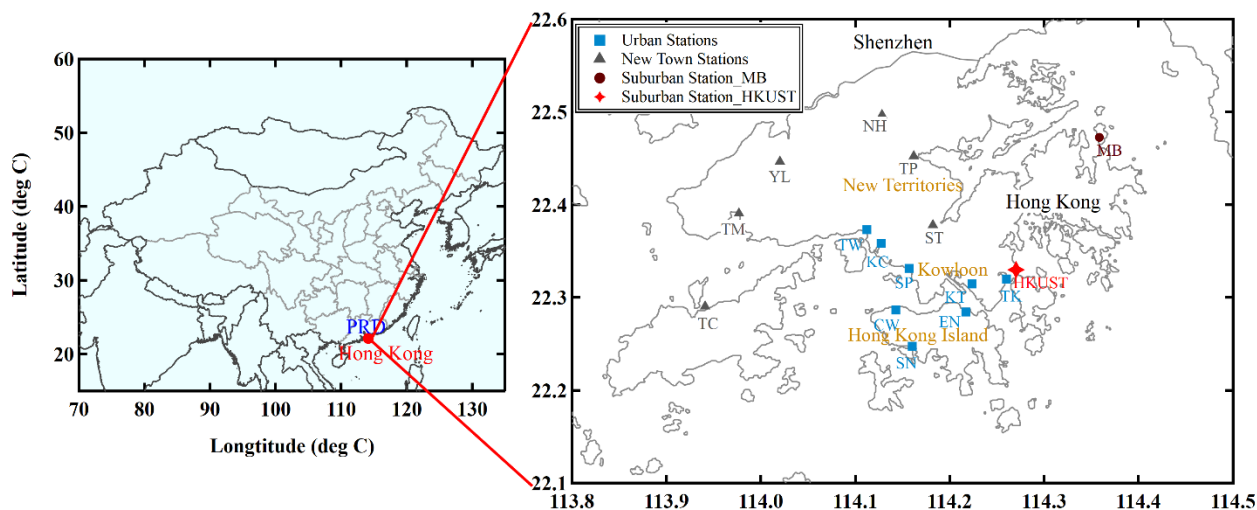

45 Figure S5. Geographical locations of the 15 HKEPD general air quality monitoring stations and the HKUST supersite.

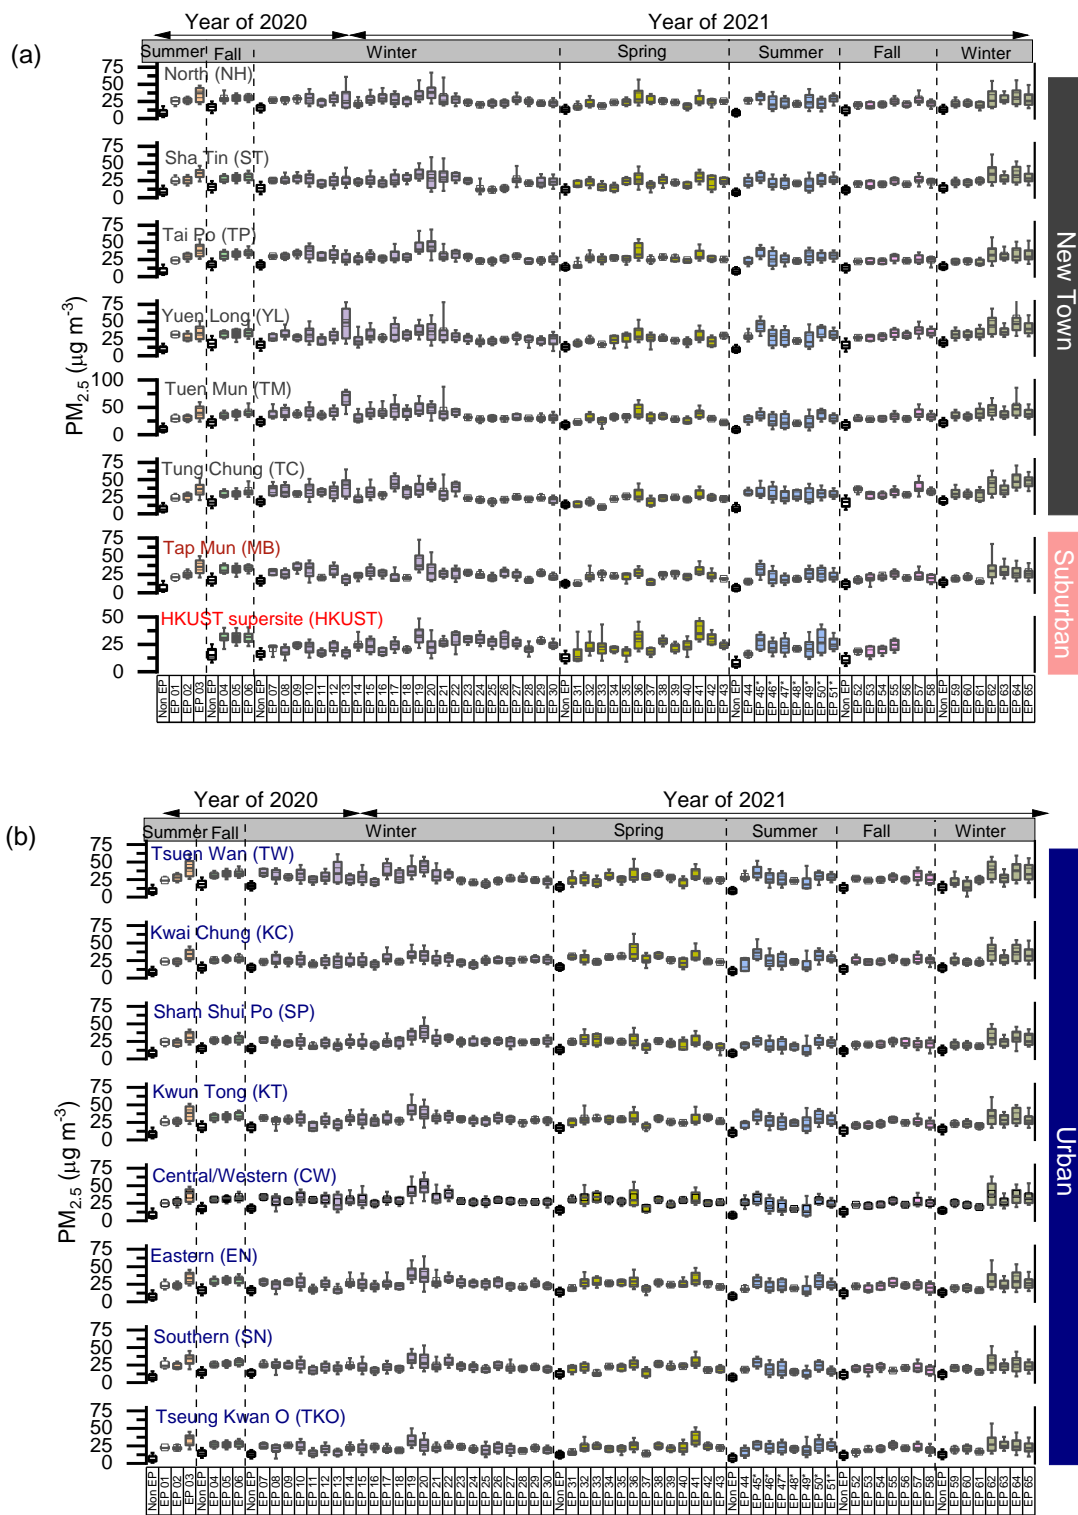

50 **Figure S6. The average concentrations of PM<sub>2.5</sub> during individual episodes (solid pattern) and those during the non-episode hours in the same season (blank pattern) in the 15 HKEPD general air quality monitoring stations and the HKUST supersite in HK.**

**Table S2. Statistical summary of PM<sub>2.5</sub> at 15 Hong Kong EPD general air quality monitoring stations and the HKUST supersite during the 65 episodes and the remaining non-episode hours for the period from 16 July 2020 to 31 December 2021. Meteorological parameters and gas pollutant data are from the HKUST supersite. The NO<sub>x</sub> and O<sub>3</sub> at MB station were used as reference during the missing period.**

| Episode | Season           | Time period (date, time)    | Duration (h) | Wind speed (m s <sup>-1</sup> ) | T (°C) | RH (%) | O <sub>3</sub> (ppb) | NO <sub>x</sub> (ppb) | Mean PM <sub>2.5</sub> concentrations |      |      |            |
|---------|------------------|-----------------------------|--------------|---------------------------------|--------|--------|----------------------|-----------------------|---------------------------------------|------|------|------------|
|         |                  |                             |              |                                 |        |        |                      |                       | City-wide                             | Min  | Max  | Max-to-min |
| EP01    | 2020 summer      | 21 Aug, 09:00-22 Aug, 22:00 | 38           | 1.71                            | 28.9   | 78.6   | 33.4                 | 4.8                   | 24.9                                  | 21.1 | 31.0 | 1.5        |
| EP02    | 2020 summer      | 29 Aug, 10:00-31 Aug, 23:00 | 38           | 1.64                            | 29.4   | 76.2   | 58.7                 | 5.4                   | 25.7                                  | 22.1 | 30.1 | 1.4        |
| EP03    | 2020 summer      | 01 Sep, 12:00-04 Sep, 23:00 | 84           | 1.36                            | 29.5   | 79.2   | 60.2                 | 7.1                   | 36.0                                  | 30.9 | 41.7 | 1.3        |
| Non-EP  | 2020 summer      | 16 July, 00:00-7 Oct, 23:00 | 1841         | 2.47                            | 27.4   | 84.5   | 53.8                 | 4.9                   | 8.50                                  | 7.10 | 10.6 | 1.5        |
| EP04    | 2020 fall        | 29 Oct, 19:00-30 Oct, 20:00 | 26           | 2.39                            | 22.6   | 82.3   | 38.2                 | 7.9                   | 29.4                                  | 25.4 | 35.2 | 1.4        |
| EP05    | 2020 fall        | 02 Nov, 09:00-04 Nov, 21:00 | 61           | 3.91                            | 23.2   | 65.5   | 57.8                 | 8.9                   | 30.5                                  | 26.7 | 37.7 | 1.4        |
| EP06    | 2020 fall        | 06 Nov, 11:00-10 Nov, 23:00 | 109          | 3.38                            | 24.2   | 57.1   | 68.9                 | 11                    | 32.7                                  | 28.2 | 40.6 | 1.4        |
| Non-EP  | 2020 fall        | 08 Oct, 00:00-23 Nov, 23:00 | 932          | 3.46                            | 23.2   | 74.3   | 52.8                 | 6.6                   | 17.1                                  | 14.4 | 22.8 | 1.6        |
| EP07    | 2020-2021 winter | 24 Nov, 08:00-19:00         | 11           | 3.24                            | 23.5   | 73.2   | 48.5                 | 14                    | 29.4                                  | 23.2 | 38.3 | 1.7        |
| EP08    | 2020-2021 winter | 26 Nov, 10:00-27 Nov, 03:00 | 18           | 2.01                            | 23.2   | 79.1   | 59.8                 | 8.0                   | 27.7                                  | 20.2 | 38.8 | 1.9        |
| EP09    | 2020-2021 winter | 02 Dec, 19:00-03 Dec, 11:00 | 17           | 5.55                            | 16.5   | 66.2   | 28.9                 | 9.2                   | 28.5                                  | 22.4 | 37.3 | 1.7        |
| EP10    | 2020-2021 winter | 05 Dec, 00:00-14 Dec 00:00  | 239          | 2.59                            | 18.6   | 74.1   | 42.4                 | 11                    | 30.8                                  | 24.2 | 43.2 | 1.8        |
| EP11    | 2020-2021 winter | 17 Dec, 11:00-23:00         | 13           | 2.90                            | 15.0   | 66.3   | 6.60                 | 25                    | 23.0                                  | 14.5 | 35.1 | 2.4        |
| EP12    | 2020-2021 winter | 19 Dec, 13:00-25 Dec 23:00  | 155          | 3.63                            | 16.3   | 68.5   | 37.8                 | 8.9                   | 28.3                                  | 20.6 | 41.5 | 2.0        |
| EP13    | 2020-2021 winter | 27 Dec, 11:00-28 Dec, 11:00 | 25           | 1.89                            | 20.5   | 58.0   | 61.5                 | 5.1                   | 29.3                                  | 15.6 | 65.8 | 4.2        |
| EP14    | 2020-2021 winter | 29 Dec, 00:00-30 Dec, 05:00 | 30           | 2.67                            | 19.2   | 73.5   | 43.0                 | 10                    | 25.5                                  | 21.7 | 32.0 | 1.5        |
| EP15    | 2020-2021 winter | 03 Jan, 03:00-08 Jan, 23:00 | 141          | 3.44                            | 14.4   | 64.0   | 45.6                 | 8.1                   | 29.1                                  | 22.6 | 42.2 | 1.9        |
| EP16    | 2020-2021 winter | 12 Jan, 00:00-23:00         | 24           | 5.52                            | 11.4   | 22.0   | 40.4                 | 10                    | 25.1                                  | 17.2 | 41.5 | 2.4        |
| EP17    | 2020-2021 winter | 14 Jan, 05:00-23:00         | 19           | 1.81                            | 15.0   | 45.7   | 64.7                 | 12                    | 30.5                                  | 20.4 | 47.8 | 2.3        |
| EP18    | 2020-2021 winter | 15 Jan, 15:00-16 Jan, 12:00 | 22           | 1.74                            | 15.9   | 61.5   | 78.0                 | 6.6                   | 26.8                                  | 18.7 | 41.2 | 2.2        |
| EP19    | 2020-2021 winter | 16 Jan, 22:00-19 Jan, 11:00 | 62           | 3.57                            | 14.0   | 56.7   | 54.6                 | 7.7                   | 39.2                                  | 33.1 | 49.2 | 1.5        |
| EP20    | 2020-2021 winter | 21 Jan, 22:00-24 Jan, 08:00 | 59           | 1.81                            | 20.2   | 73.1   | 39.1                 | 14                    | 38.1                                  | 27.7 | 51.5 | 1.9        |
| EP21    | 2020-2021 winter | 25 Jan, 04:00-27 Jan, 21:00 | 66           | 1.76                            | 17.6   | 78.5   | 56.2                 | 9.3                   | 30.9                                  | 22.7 | 44.1 | 1.9        |
| EP22    | 2020-2021 winter | 28 Jan, 08:00-23:00         | 16           | 3.16                            | 20.3   | 55.1   | 60.0                 | 7.9                   | 31.7                                  | 25.2 | 41.1 | 1.6        |
| EP23    | 2020-2021 winter | 29 Jan, 21:00-30 Jan, 16:00 | 20           | 3.21                            | 14.8   | 70.1   | 59.2                 | 4.2                   | 25.8                                  | 22.3 | 31.6 | 1.4        |
| EP24    | 2020-2021 winter | 02 Feb, 18:00-03 Feb, 11:00 | 18           | 3.78                            | 16.3   | 78.2   | 57.8                 | 3.7                   | 22.4                                  | 12.8 | 28.5 | 2.2        |
| EP25    | 2020-2021 winter | 06 Feb, 10:00-08 Feb, 14:00 | 53           | 2.03                            | 19.2   | 73.2   | 56.3                 | 8.8                   | 22.9                                  | 17.5 | 30.0 | 1.7        |
| EP26    | 2020-2021 winter | 09 Feb, 01:00-18:00         | 18           | 4.29                            | 16.3   | 82.7   | 56.8                 | 2.5                   | 24.8                                  | 13.7 | 31.1 | 2.3        |
| EP27    | 2020-2021 winter | 14 Feb, 17:00-15 Feb, 13:00 | 21           | 1.51                            | 20.6   | 60.9   | 51.8                 | 9.5                   | 25.9                                  | 19.7 | 32.1 | 1.6        |
| EP28    | 2020-2021 winter | 16 Feb, 20:00-17 Feb, 07:00 | 12           | 2.65                            | 17.3   | 72.1   | 49.1                 | 3.8                   | 23.1                                  | 17.3 | 29.9 | 1.7        |
| EP29    | 2020-2021 winter | 17 Feb, 22:00-18 Feb, 23:00 | 26           | 3.06                            | 16.6   | 68.6   | 49.5                 | 3.7                   | 24.8                                  | 21.7 | 29.9 | 1.4        |
| EP30    | 2020-2021 winter | 20 Feb, 12:00-22 Feb, 13:00 | 50           | 1.68                            | 18.8   | 76.9   | 68.0                 | 5.2                   | 24.1                                  | 18.8 | 31.3 | 1.7        |
| Non-EP  | 2020-2021 winter | 24 Nov, 00:00-28 Feb, 23:00 | 1192         | 3.24                            | 16.6   | 67.8   | 43.6                 | 6.9                   | 16.3                                  | 13.2 | 23.4 | 1.8        |
| EP31    | 2021 spring      | 01 Mar, 20:00-02 Mar, 06:00 | 11           | 2.32                            | 19.6   | 89.5   | 37.2                 | 13                    | 21.4                                  | 13.7 | 30.9 | 2.3        |
| EP32    | 2021 spring      | 04 Mar, 20:00-05 Mar, 23:00 | 39           | 1.74                            | 17.8   | 95.8   | 31.8                 | 7.3                   | 26.1                                  | 17.6 | 33.5 | 1.9        |
| EP33    | 2021 spring      | 06 Mar, 09:00-20:00         | 12           | 1.34                            | 18.9   | 99.9   | 34.5                 | 5.5                   | 22.6                                  | 9.60 | 34.1 | 3.6        |

|        |             |                               |      |      |      |      |      |     |      |      |      |     |
|--------|-------------|-------------------------------|------|------|------|------|------|-----|------|------|------|-----|
| EP34   | 2021 spring | 14 Mar, 10:00-23:00           | 14   | 2.11 | 19.2 | 85.3 | 67.7 | 5.7 | 25.4 | 15.0 | 32.5 | 2.2 |
| EP35   | 2021 spring | 21 Mar, 07:00-14:00           | 8    | 4.57 | 20.3 | 74.0 | 18.6 | 12  | 25.8 | 20.8 | 32.5 | 1.6 |
| EP36   | 2021 spring | 22 Mar, 16:00-25 Mar, 23:00   | 80   | 2.60 | 19.0 | 64.6 | 45.7 | 14  | 31.7 | 25.8 | 41.9 | 1.6 |
| EP37   | 2021 spring | 04 Apr, 10:00-23:00           | 14   | 2.64 | 21.7 | 97.5 | 46.1 | 5.8 | 21.1 | 13.9 | 30.8 | 2.2 |
| EP38   | 2021 spring | 05 Apr, 19:00-07 Apr, 21:00   | 32   | 2.31 | 21.3 | 85.2 | 67.9 | 5.4 | 27.7 | 23.0 | 33.9 | 1.5 |
| EP39   | 2021 spring | 09 Apr, 21:00-10 Apr, 09:00   | 13   | 4.07 | 19.2 | 76.7 | 50.6 | 5.1 | 24.3 | 21.2 | 28.1 | 1.3 |
| EP40   | 2021 spring | 17 Apr, 10:00-21:00           | 12   | 1.80 | 21.1 | 93.3 | 53.4 | 7.3 | 22.6 | 18.0 | 29.3 | 1.6 |
| EP41   | 2021 spring | 18 Apr, 11:00-19 Apr, 16:00   | 30   | 4.67 | 20.9 | 72.2 | 80.1 | 5.5 | 31.6 | 26.8 | 39.1 | 1.5 |
| EP42   | 2021 spring | 23 Apr, 08:00-22:00           | 15   | 1.91 | 28.1 | 69.0 | 48.7 | 32  | 24.1 | 17.9 | 32.1 | 1.8 |
| EP43   | 2021 spring | 02 May, 00:00-12:00           | 13   | 1.26 | 25.1 | 78.4 | 46.0 | 13  | 23.0 | 16.6 | 29.4 | 1.8 |
| Non-EP | 2021 spring | 01 Mar, 00:00-02 May, 23:00   | 1219 | 2.52 | 21.5 | 85.5 | 40.9 | 7.6 | 14.0 | 12.0 | 18.0 | 1.5 |
| EP44   | 2021 summer | 05 May, 14:00-23:00           | 10   | 2.18 | 26.0 | 81.5 | 70.3 | 19  | 23.0 | 15.2 | 31.0 | 2.0 |
| EP45   | 2021 summer | 05 June, 14:00-06 June, 23:00 | 34   | 1.65 | 27.2 | 73.3 | 81.4 | 18  | 32.8 | 25.3 | 44.5 | 1.8 |
| EP46   | 2021 summer | 23 July, 13:00-25 July, 16:00 | 52   | 1.50 | 29.7 | 78.2 | 71.3 | 17  | 24.0 | 19.6 | 29.3 | 1.5 |
| EP47   | 2021 summer | 27 July, 10:00-28 July, 17:00 | 32   | 1.15 | 30.4 | 78.6 | 43.9 | 19  | 23.1 | 18.6 | 27.2 | 1.5 |
| EP48   | 2021 summer | 06 Aug, 09:00-07 Aug, 13:00   | 20   | 1.49 | 28.0 | 87.7 | 26.5 | 25  | 21.1 | 16.0 | 26.9 | 1.7 |
| EP49   | 2021 summer | 11 Sep, 15:00-13 Sep, 18:00   | 52   | 1.35 | 31.0 | 76.5 | 51.4 | 16  | 21.6 | 13.4 | 29.8 | 2.2 |
| EP50   | 2021 summer | 17 Sep, 08:00-18 Sep, 03:00   | 20   | 1.67 | 28.9 | 83.5 | 79.6 | 7.7 | 28.8 | 21.8 | 36.5 | 1.7 |
| EP51   | 2021 summer | 27 Sep, 14:00-02 Oct, 03:00   | 110  | 1.43 | 28.7 | 81.2 | 55.3 | 11  | 26.7 | 16.1 | 31.8 | 2.0 |
| Non-EP | 2021 summer | 03 May, 00:00-07 Oct, 23:00   | 3462 | 2.16 | 27.8 | 85.0 | 28.0 | 9.9 | 8.40 | 6.60 | 10.2 | 1.6 |
| EP52   | 2021 fall   | 23 Oct, 15:00-23:00           | 9    | 3.44 | 19.8 | 75.6 | 20.4 | 21  | 22.8 | 16.0 | 35.6 | 2.2 |
| EP53   | 2021 fall   | 27 Oct, 12:00-22:00           | 11   | 2.40 | 24.2 | 79.7 | 66.1 | 10  | 21.9 | 18.2 | 28.2 | 1.5 |
| EP54   | 2021 fall   | 28 Oct, 12:00-29 Oct, 21:00   | 34   | 3.16 | 23.8 | 81.6 | 66.2 | 6.6 | 23.4 | 19.7 | 29.1 | 1.5 |
| EP55   | 2021 fall   | 30 Oct, 10:00-01 Nov, 20:00   | 59   | 2.95 | 23.2 | 79.1 | 58.5 | 9.7 | 27.5 | 17.2 | 33.5 | 1.9 |
| EP56   | 2021 fall   | 03 Nov, 10:00-04 Nov, 09:00   | 24   | 3.01 | 23.8 | 80.5 | 63.6 | 6.1 | 23.6 | 19.5 | 30.0 | 1.5 |
| EP57   | 2021 fall   | 15 Nov, 22:00-18 Nov, 04:00   | 55   | 2.67 | 21.7 | 73.9 | 39.2 | 8.7 | 28.3 | 20.8 | 39.8 | 1.9 |
| EP58   | 2021 fall   | 18 Nov, 17:00-20 Nov, 07:00   | 39   | 2.15 | 21.5 | 79.1 | 43.1 | 6.5 | 24.3 | 17.4 | 34.5 | 2.0 |
| Non-EP | 2021 fall   | 08 Oct, 00:00-24 Nov, 23:00   | 897  | 4.23 | 22.5 | 74.1 | 35.1 | 5.6 | 13.2 | 11.3 | 18.0 | 1.6 |
| EP59   | 2021 winter | 24 Nov, 14:00-27 Nov, 06:00   | 65   | 2.56 | 19.9 | 61.8 | 38.9 | 10  | 24.0 | 19.1 | 35.1 | 1.8 |
| EP60   | 2021 winter | 27 Nov, 18:00-01 Dec, 04:00   | 83   | 3.82 | 20.5 | 61.6 | 39.9 | 8.5 | 23.0 | 16.6 | 32.7 | 2.0 |
| EP61   | 2021 winter | 09 Dec, 14:00-10 Dec, 11:00   | 21   | 2.34 | 18.6 | 75.8 | 36.3 | 7.3 | 22.4 | 15.0 | 39.5 | 2.6 |
| EP62   | 2021 winter | 11 Dec, 15:00-15 Dec, 02:00   | 84   | 2.45 | 19.4 | 72.5 | 44.9 | 8.4 | 36.6 | 30.0 | 46.4 | 1.6 |
| EP63   | 2021 winter | 18 Dec, 19:00-20 Dec, 16:00   | 64   | 4.43 | 15.9 | 58.0 | 34.6 | 8.4 | 29.3 | 23.3 | 37.9 | 1.6 |
| EP64   | 2021 winter | 23 Dec, 19:00-26 Dec, 19:00   | 73   | 3.08 | 17.0 | 81.2 | 22.4 | 11  | 36.9 | 26.6 | 54.4 | 2.0 |
| EP65   | 2021 winter | 27 Dec, 12:00-31 Dec, 23:00   | 108  | 2.72 | 15.9 | 75.3 | 24.5 | 13  | 32.7 | 23.6 | 48.2 | 2.0 |
| Non-EP | 2021 winter | 25 Nov, 00:00-31 Dec, 23:00   | 414  | 3.63 | 18.1 | 63.2 | 36.2 | 7.2 | 15.0 | 11.9 | 21.7 | 1.8 |



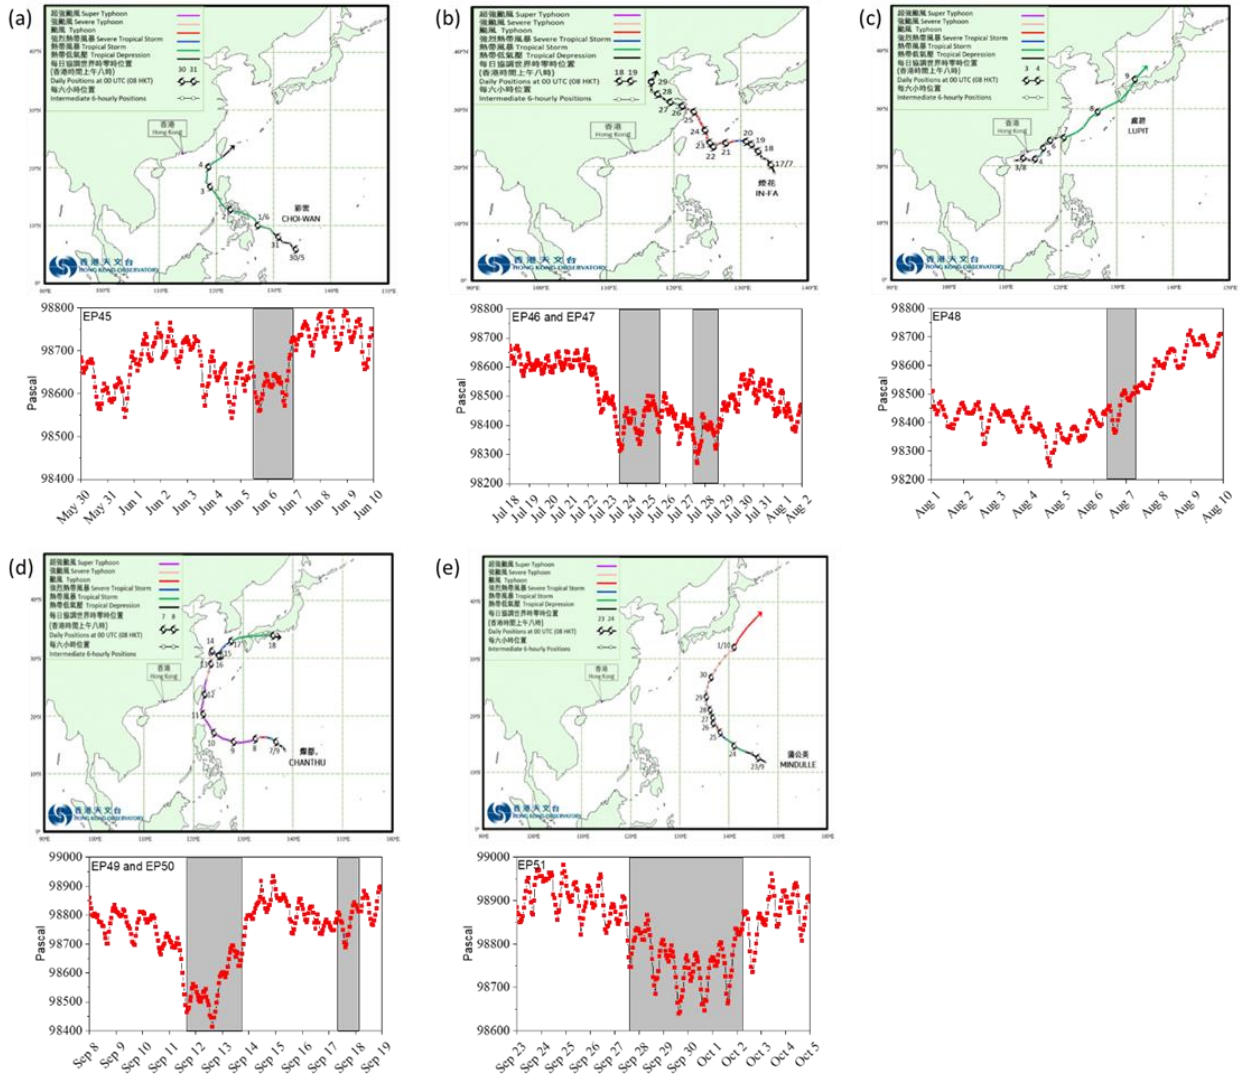

Figure S7. The provisional tropical cyclone tracks of (a) Chaiwan, (b) Infa, (c) Lupit, (d) Chanthu and (e) Mindulle together with the corresponding atmospheric pressure (pascal) at the HKUST supersite. The episode period is indicated by the grey area. The tropical cyclone tracks are downloaded from Hong Kong Observatory website.

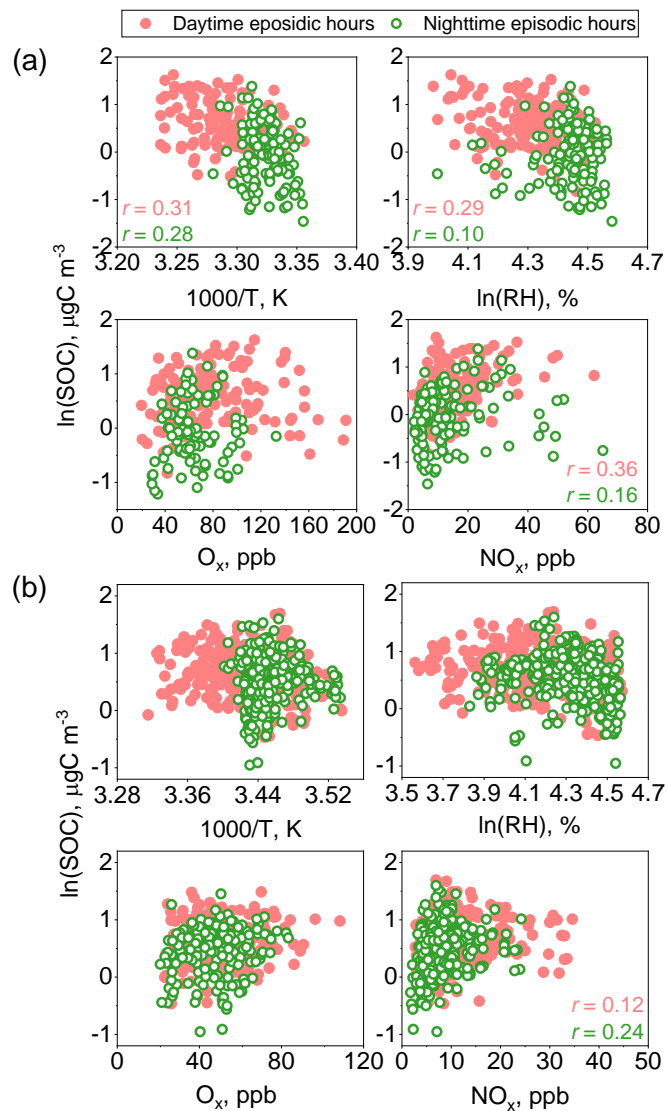

**Figure S8.** Scatter plot of SOC with meteorological parameters (i.e., temperature and RH), and oxidants (i.e.,  $O_x$  and  $NO_x$ ) during the episodic hours in (a) summer typhoon episodes and (b) winter haze episodes. The solid red circle represents daytime hours, blank green circle represents nighttime hours.

**Table S3. Statistical summary of aerosol water content and [H<sup>+</sup>] during the summer typhoon episodes and winter haze episodes during the daytime and nighttime, respectively.**

| Episodes                | Day/night | AWC ( $\mu\text{g m}^{-3}$ ) | [H <sup>+</sup> ] ( $\text{mol m}^{-3}$ ) |
|-------------------------|-----------|------------------------------|-------------------------------------------|
| Summer typhoon episodes | Day       | $12.5 \pm 8.34$              | $1.70 \pm 1.20 \text{ E-10}$              |
| Summer typhoon episodes | Night     | $23.1 \pm 23.4$              | $1.49 \pm 1.00 \text{ E-10}$              |
| Winter haze episodes    | Day       | $6.36 \pm 6.60$              | $7.51 \pm 1.80 \text{ E-11}$              |
| Winter haze episodes    | Night     | $8.86 \pm 8.47$              | $1.54 \pm 9.72 \text{ E-10}$              |

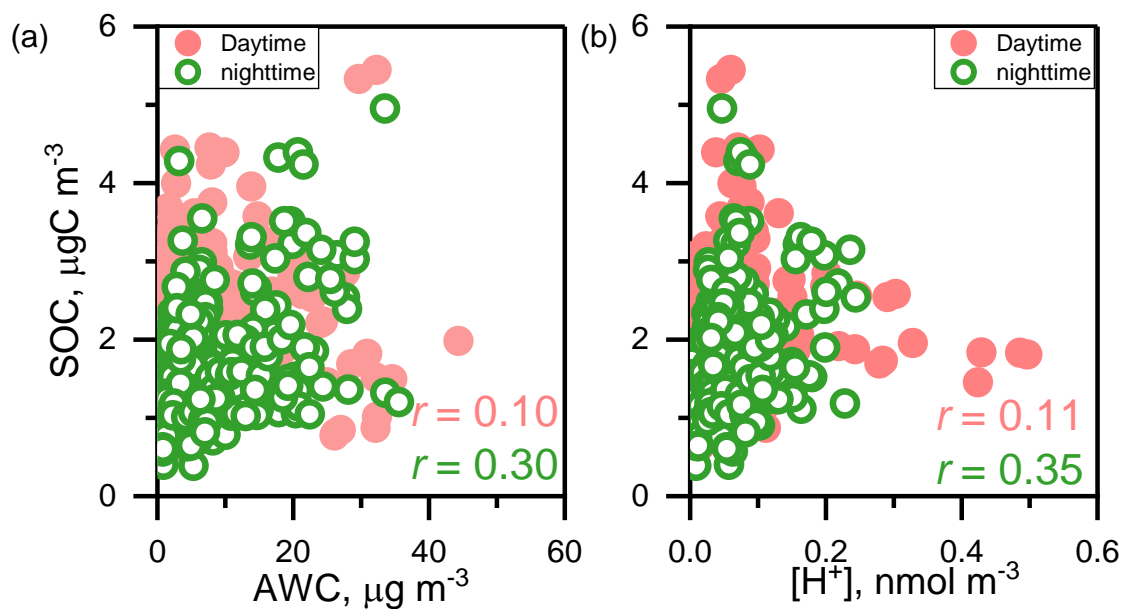

**Figure S9. Scatter plot of SOC with (a) aerosol water contents (AWC) and (b) [H<sup>+</sup>] during the winter haze episodes. The solid red circle represents daytime hours, blank green circle represents nighttime hours.**
